# Supplementary material for: Biological Effect of Quercetin in Repairing Brain Damage and Cerebral Changes in Rats: Molecular Docking and In Vivo Studies
Source: Hindawi journal article supplement (doi:10.1155/2022/8962149), 2022-01-01

## 2D and 3D figures for docking with GST

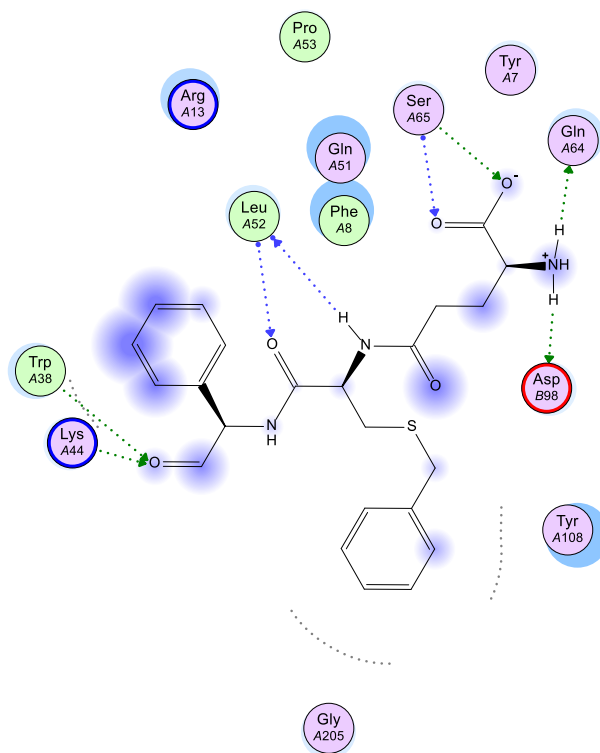

Co-crystallized ligand (**L-gamma-glutamyl-S-benzyl-N-[(S)-carboxy(phenyl)methyl]-L-cysteinamide**) inside 10GS, S = -14,23 Kcal/mol

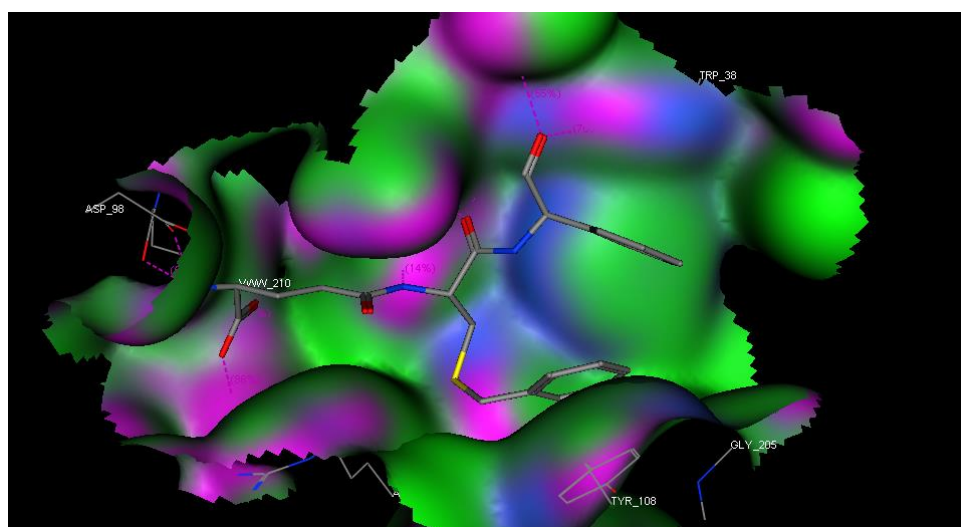

Co-crystallized ligand (**L-gamma-glutamyl-S-benzyl-N-[(S)-carboxy(phenyl)methyl]-L-cysteinamide**) inside 10GS, S = -14,23 Kcal/mol

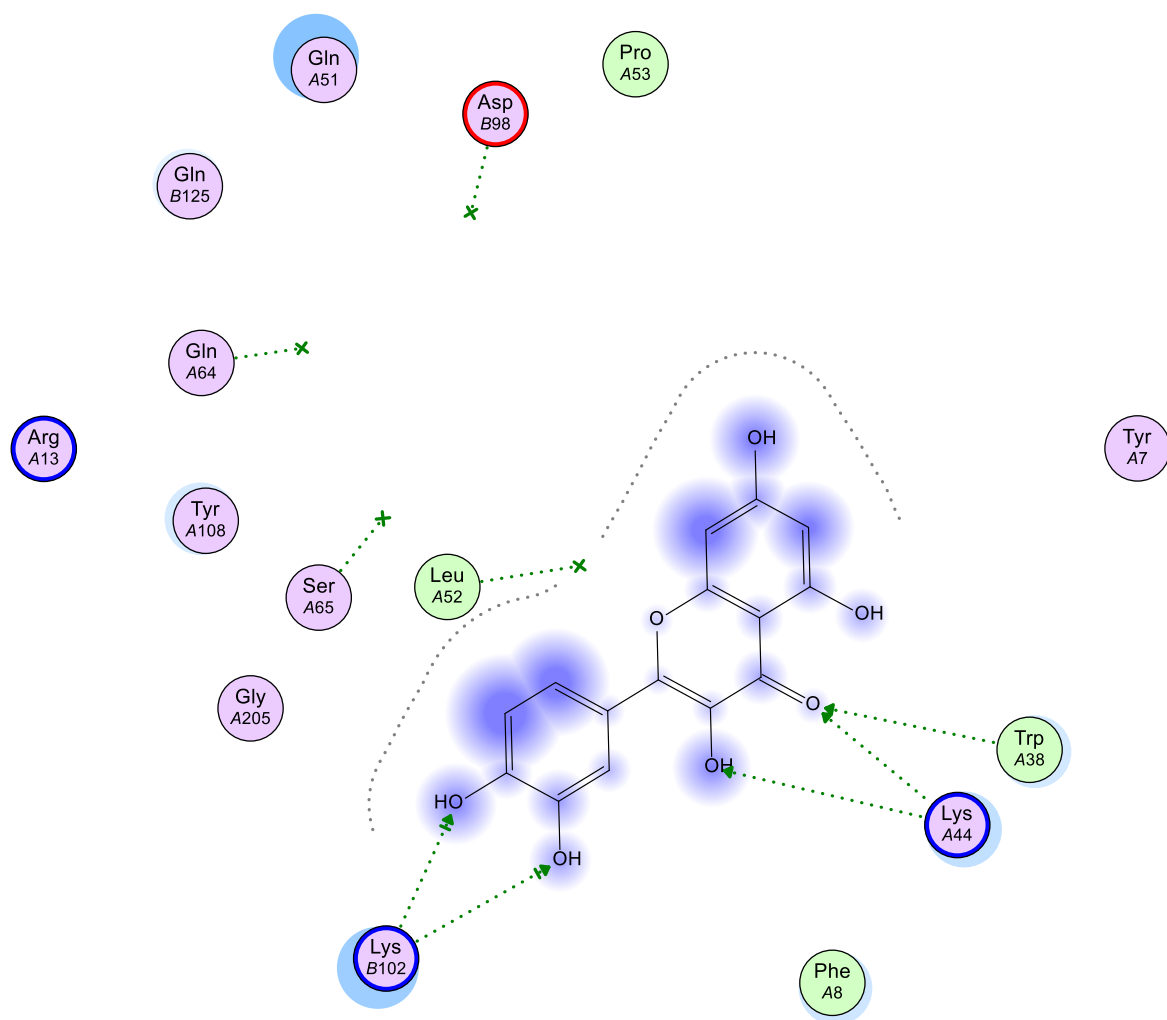

Quercetin

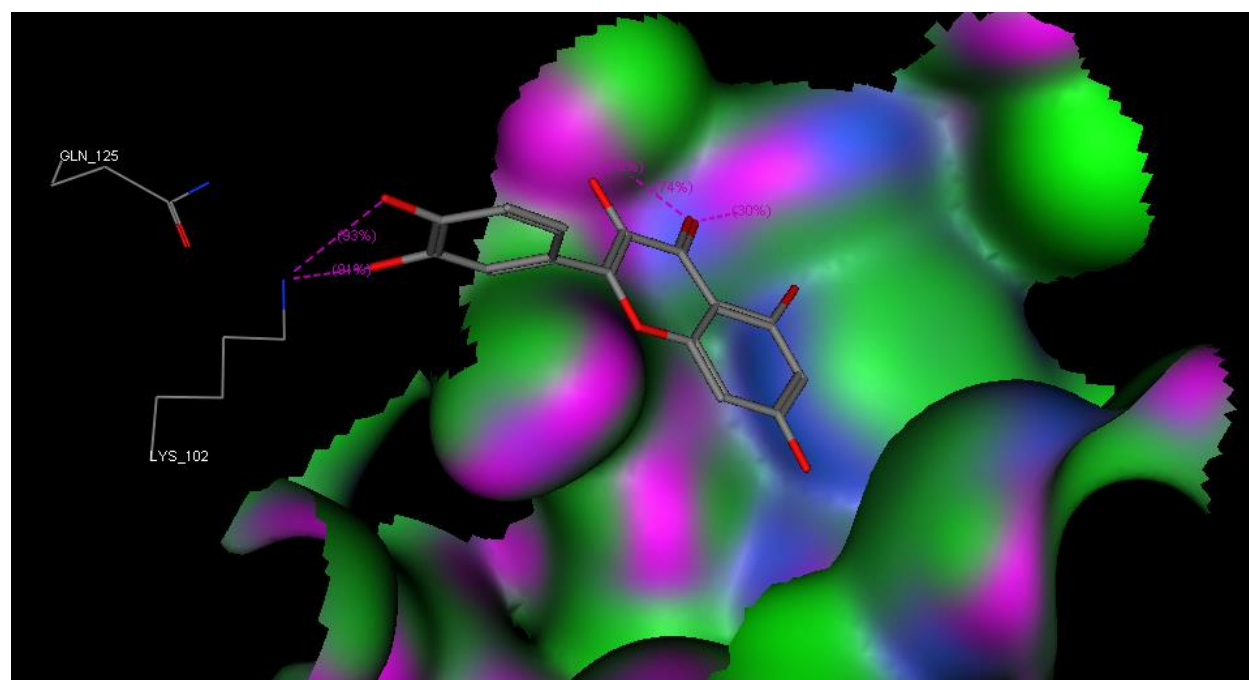

Supplement: f1 [file 8962149.f1.zip]
