# Supplementary material for: Biological Effect of Quercetin in Repairing Brain Damage and Cerebral Changes in Rats: Molecular Docking and In Vivo Studies
Source: Hindawi journal article supplement (doi:10.1155/2022/8962149), 2022-01-01
Supplement: f1 [file 8962149.f1.zip]

## 2D and 3D figures for docking with GR

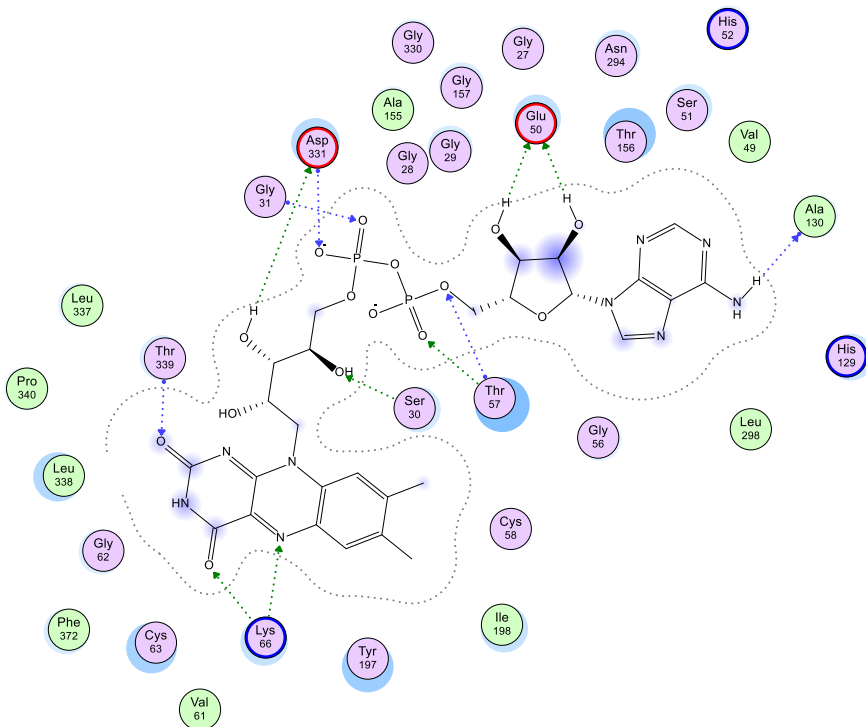

Co-crystallized ligand inside [1BWC](#) , S = - 8.93 Kcal/mol

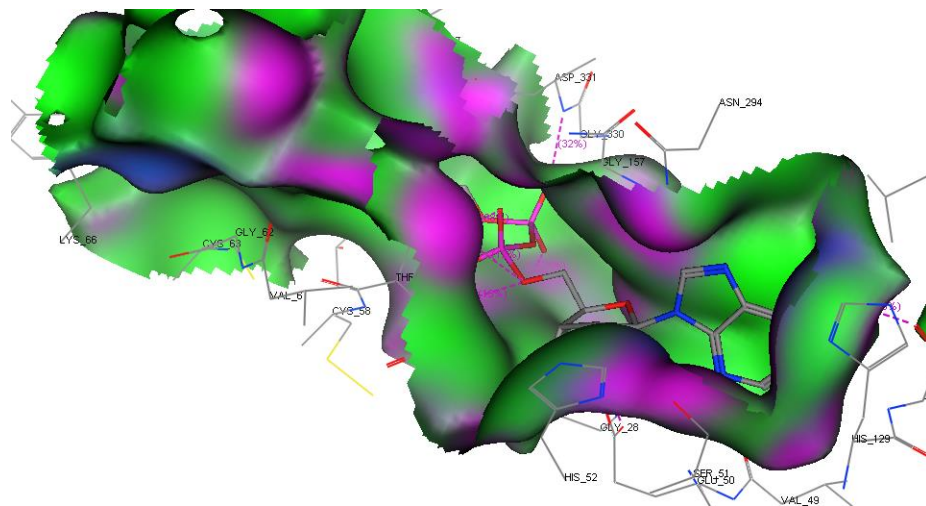

Co-crystallized ligand inside [1BWC](#)

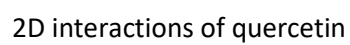

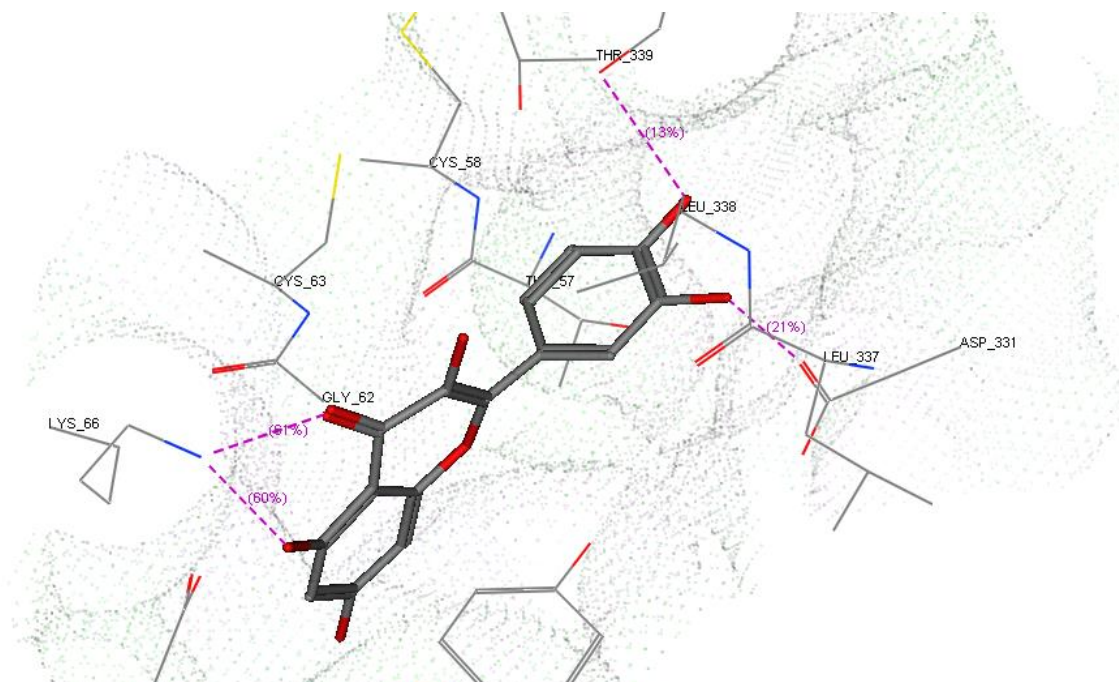

3D Quercetin
