# Supplementary material for: Biological Effect of Quercetin in Repairing Brain Damage and Cerebral Changes in Rats: Molecular Docking and In Vivo Studies
Source: Hindawi journal article supplement (doi:10.1155/2022/8962149), 2022-01-01

## *2D and 3D figures for Docking with CAT*

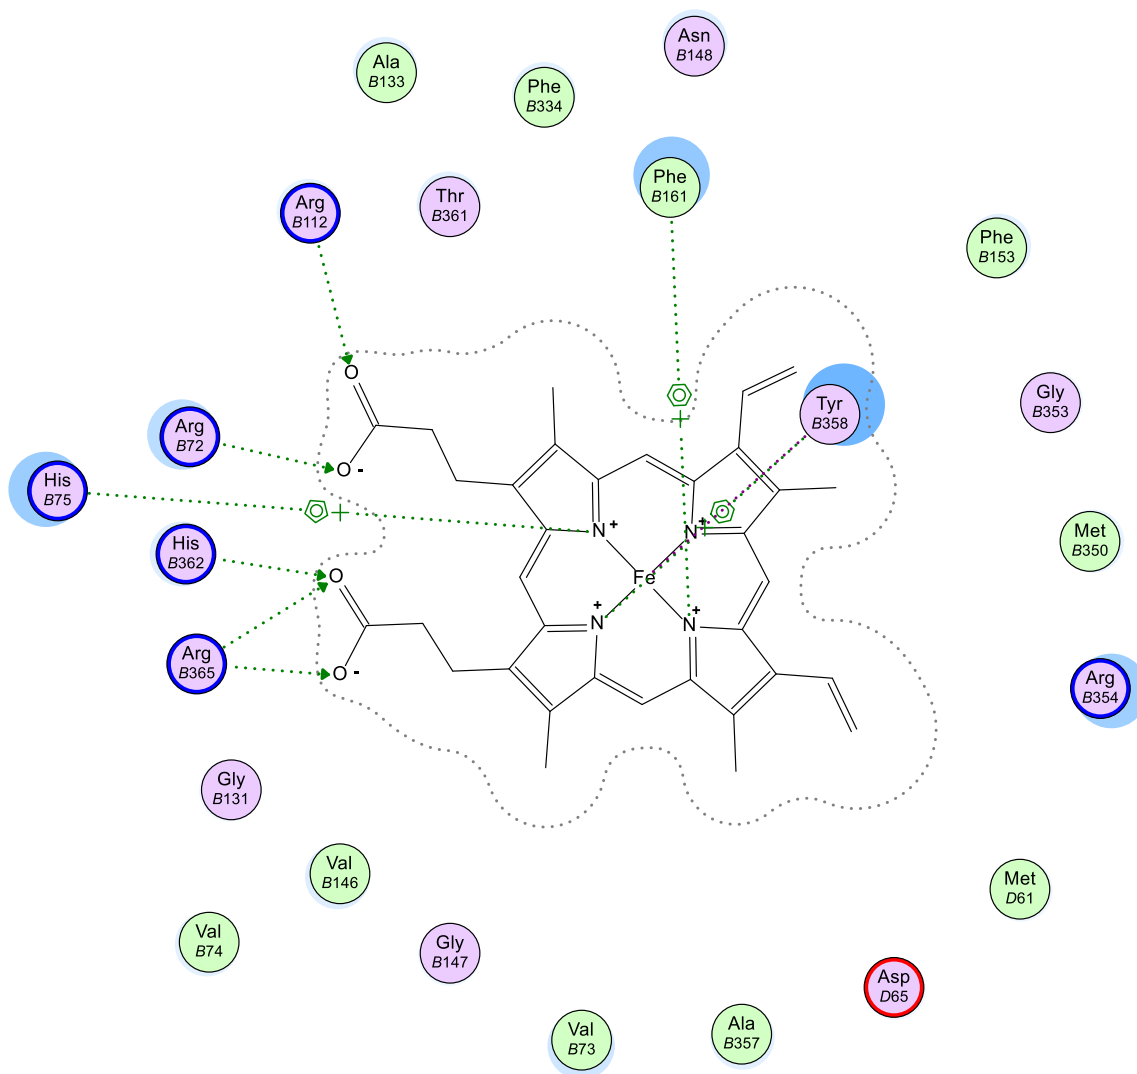

The co-crystallized ligand (**PROTOPORPHYRIN IX CONTAINING FE**)

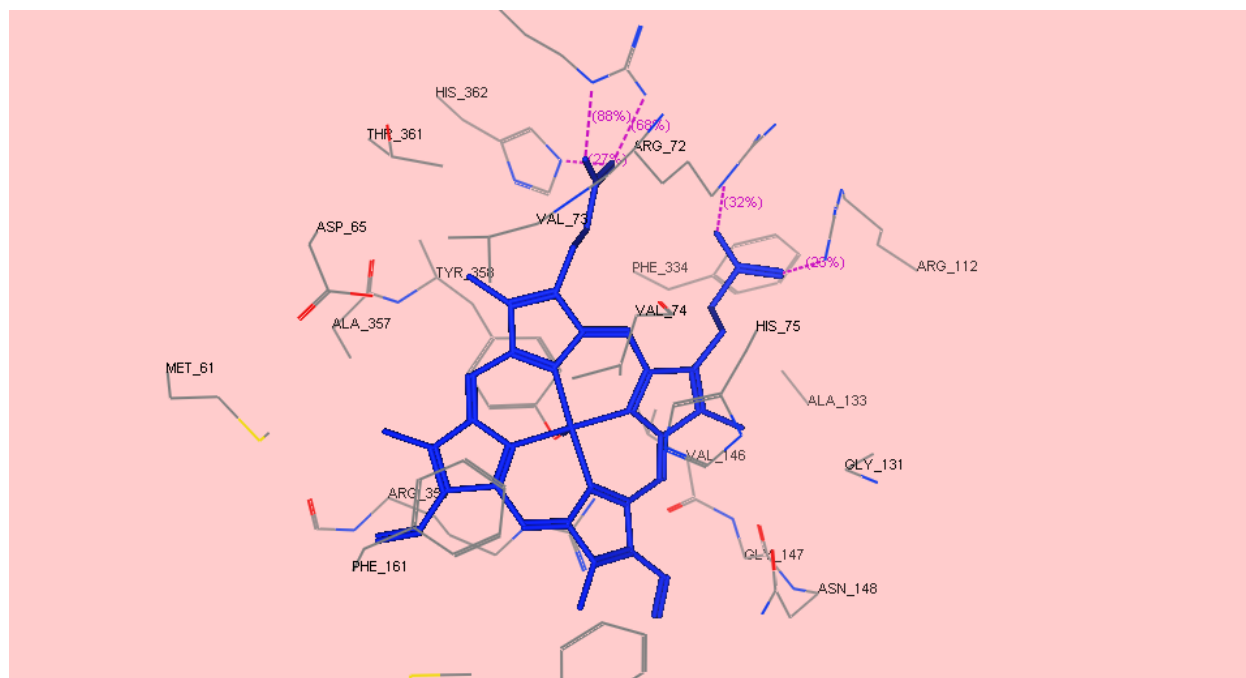

The co-crystallized ligand (**PROTOPORPHYRIN IX CONTAINING FE**) (Blue colored)

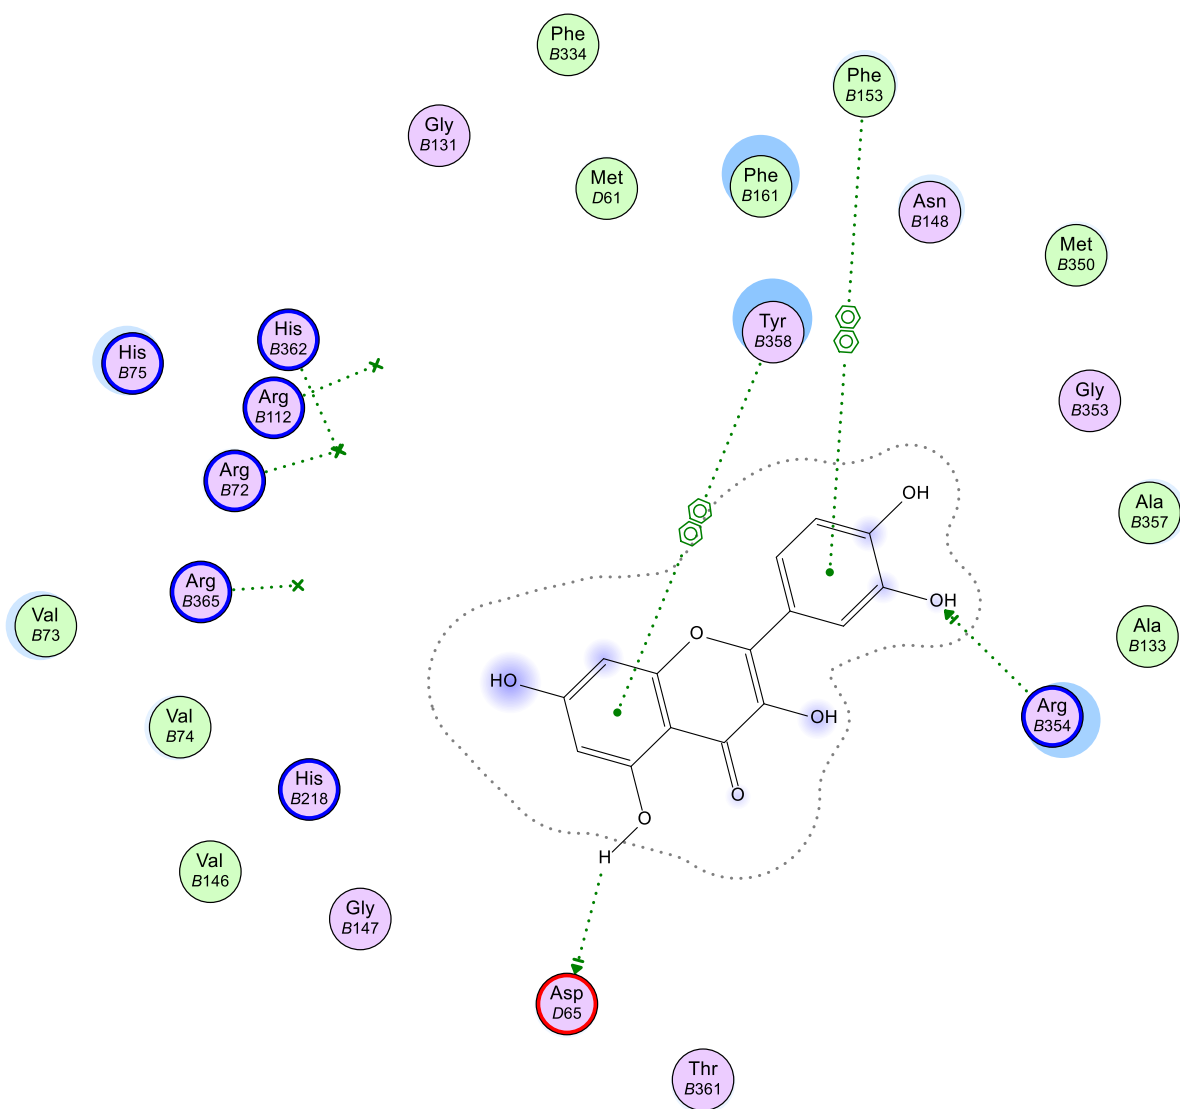

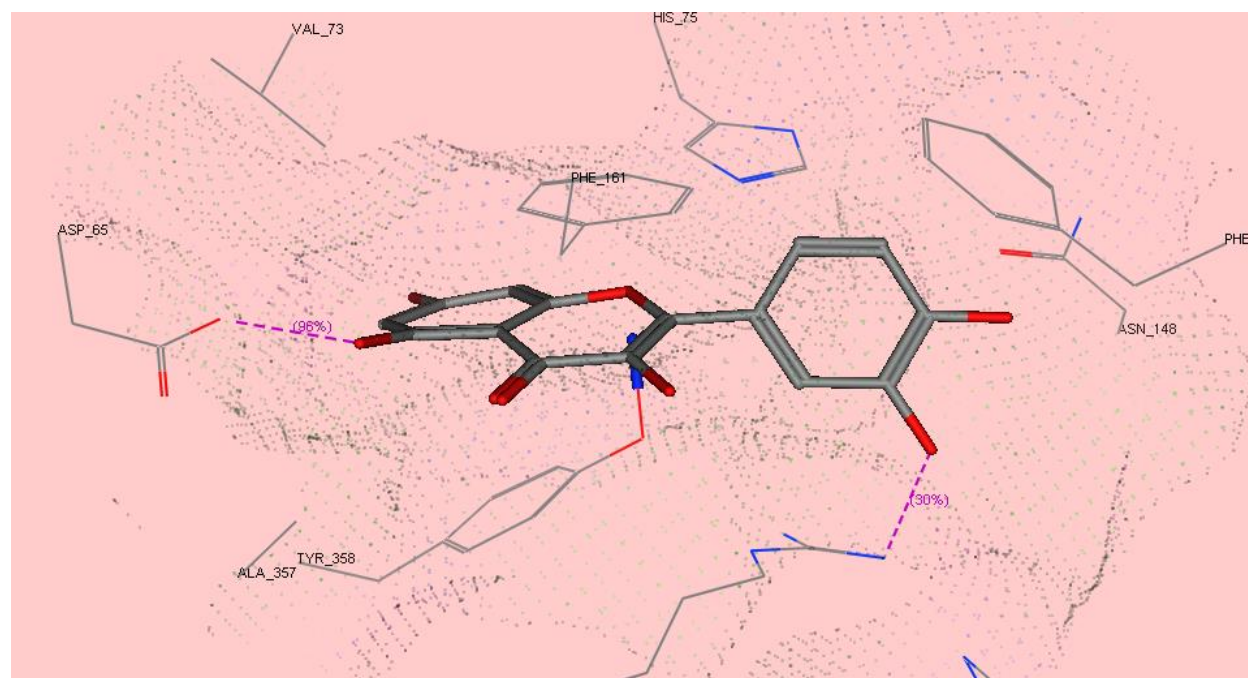

Supplement: f1 [file 8962149.f1.zip]
